# Supplementary material
Source: Springer Nature journal article supplement (https://www.springermedizin.de/resource/supplementary/12889_2012_5377_MOESM2_ESM.pdf/9494494)

Figure1. Study design and flow chart

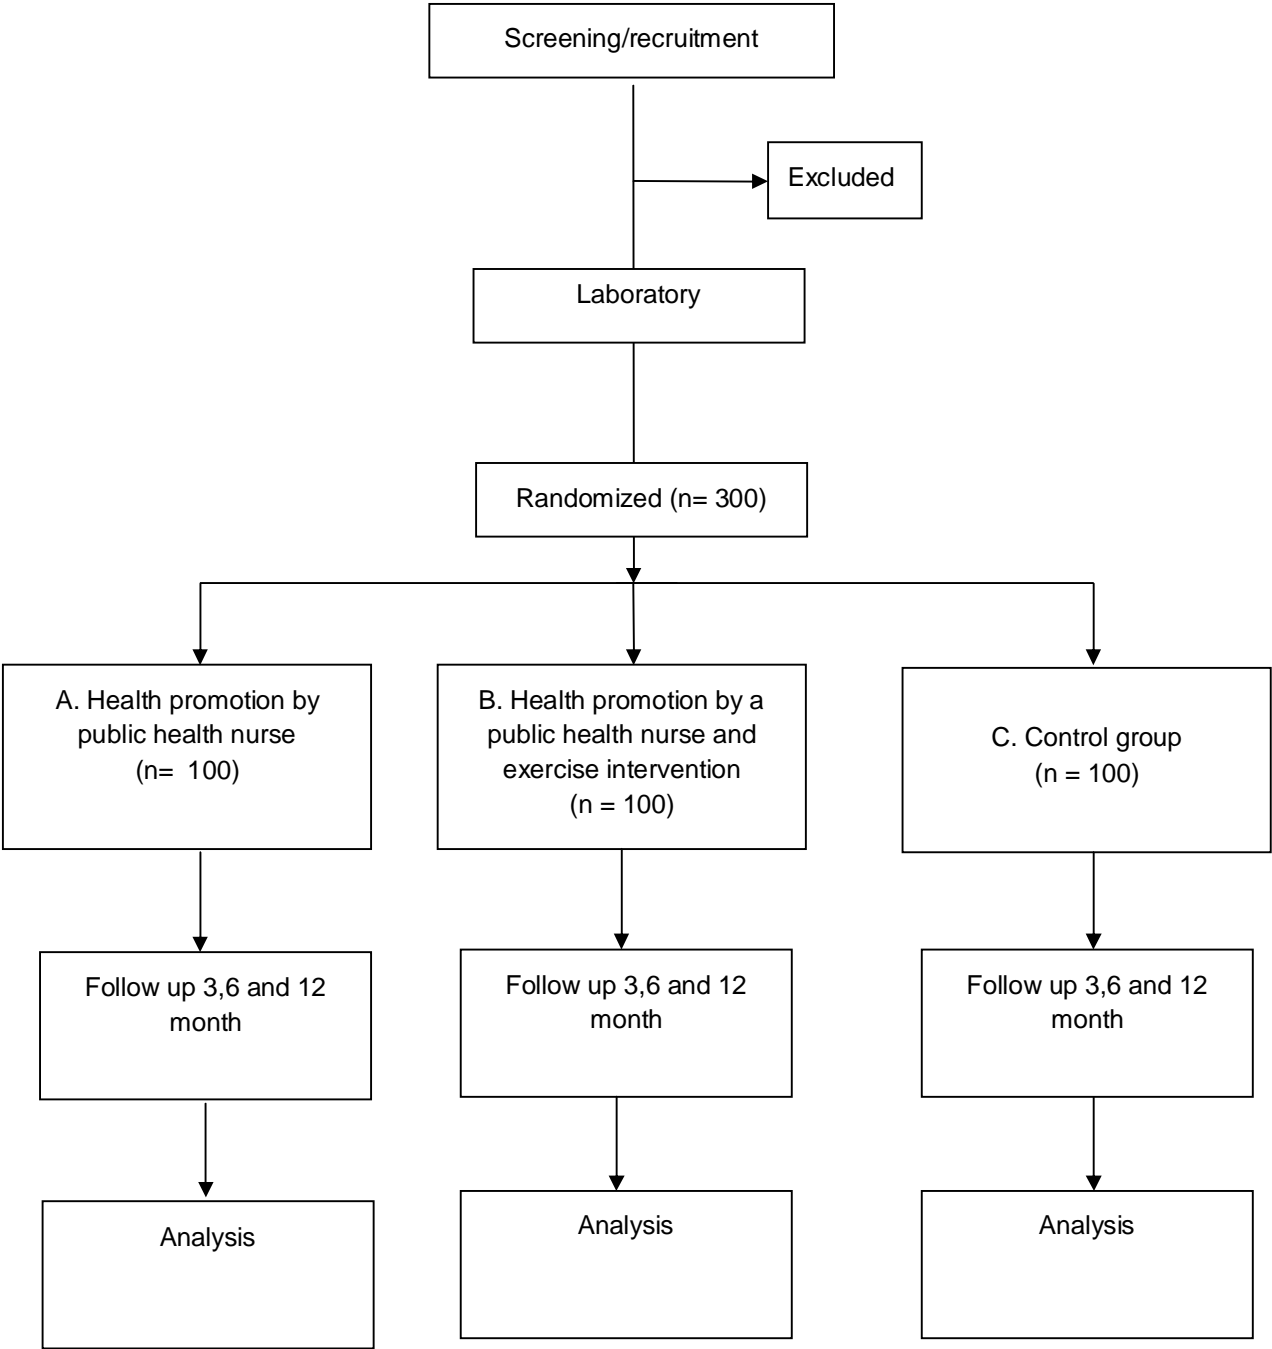

Enrollment

Allocation

Follow-Up

Analysis

Supplement: MOESM2 [file 9494494]
